# Supplementary material
Source: PubMed Central journal article supplement (PMC7548755)
Supplement: mmc1.pdf [file mmc1.pdf]

| Supplementary Table 1: Associations between injection protocol parameters and irritation |     |                      |             |                               |
|------------------------------------------------------------------------------------------|-----|----------------------|-------------|-------------------------------|
| Injection Protocol Parameter                                                             |     | Number of Injections | Irritation  | Adjusted <sup>b</sup> P-value |
| <b>Anesthesia</b>                                                                        |     | <b>42273</b>         |             |                               |
| Subconjunctival injection                                                                | Yes | 18288                | 128 (0.7%)  | 0.29                          |
|                                                                                          | No  | 23985                | 177 (0.7%)  |                               |
| Cotton swabs                                                                             | Yes | 25478                | 200 (0.8%)  | 0.07                          |
|                                                                                          | No  | 16795                | 105 (0.6%)  |                               |
| Topical drops                                                                            | Yes | 34265                | 251 (0.7%)  | 0.40                          |
|                                                                                          | No  | 8008                 | 54 (0.7%)   |                               |
| Lidocaine gel                                                                            | Yes | 9670                 | 48 (0.5%)   | 0.051                         |
|                                                                                          | No  | 32603                | 257 (0.8%)  |                               |
| Retrolubar injection                                                                     | Yes | 11                   | 0 (0%)      | 0.35                          |
|                                                                                          | No  | 42262                | 305 (0.7%)  |                               |
| <b>Preparation</b>                                                                       |     | <b>42027</b>         |             |                               |
| 10% PVI                                                                                  | Yes | 24639                | 203 (0.8%)  | 0.24                          |
|                                                                                          | No  | 17388                | 101 (0.6%)  |                               |
| 5% betadine                                                                              | Yes | 25597                | 161 (0.6%)  | 0.57                          |
|                                                                                          | No  | 16430                | 143 (0.9%)  |                               |
| Gentamycin, ciprofloxacin or ciloxan                                                     | Yes | 72                   | 0 (0%)      | 0.58                          |
|                                                                                          | No  | 41955                | 304 (0.7%)  |                               |
| Baby shampoo and/or eyelid wipes                                                         | Yes | 10                   | 0 (0%)      | 0.35                          |
|                                                                                          | No  | 42017                | 304 (0.7%)  |                               |
| None/Refused                                                                             | Yes | 51                   | 0 (0%)      | 0.48                          |
|                                                                                          | No  | 41976                | 304 (0.7%)  |                               |
| <b>Post-injection medication</b>                                                         |     | <b>42114</b>         |             |                               |
| Antibiotic drops <sup>a</sup>                                                            | Yes | 12831                | 110 (0.9%)  | 0.08                          |
|                                                                                          | No  | 29283                | 193 (0.7%)  |                               |
| Diclofenac                                                                               | Yes | 3882                 | 19 (0.5%)   | 0.11                          |
|                                                                                          | No  | 38232                | 284 (0.7%)  |                               |
| 5% betadine                                                                              | Yes | 9156                 | 59 (0.6%)   | 0.64                          |
|                                                                                          | No  | 32958                | 244 (0.7%)  |                               |
| None/Refused                                                                             | Yes | 18334                | 135 (0.74%) | 0.045                         |
|                                                                                          | No  | 23780                | 168 (0.71%) |                               |
| <b>Paracentesis</b>                                                                      | Yes | 555                  | 15 (0.4%)   | 0.17                          |
|                                                                                          | No  | 40800                | 297 (0.7%)  |                               |

Zero cells were replaced with a single complication to avoid division by zero.

<sup>a</sup>Gentamicin, ciprofloxacin, gatifloxacin, moxifloxacin, ciloxan, ofloxacin, polymixin, polymixin + trimethoprim, neomycin-polymyxin-dexamethasone, bacitracin-polymyxin, tobramycin

<sup>b</sup>Adjusted for patient sex, age, whether or not same-day bilateral injection, provider and number of visits in sample (frequency)
