# Supplementary material
Source: PubMed Central journal article supplement (PMC7548755)
Supplement: mmc2.pdf [file mmc2.pdf]

| Supplementary Table 2: Associations between injection protocol parameters and subconjunctival hemorrhage |     |                      |                            |                               |
|----------------------------------------------------------------------------------------------------------|-----|----------------------|----------------------------|-------------------------------|
| Injection Protocol Parameter                                                                             |     | Number of Injections | Subconjunctival Hemorrhage | Adjusted <sup>b</sup> P-value |
| <b>Anesthesia</b>                                                                                        |     | <b>42273</b>         |                            |                               |
| Subconjunctival injection                                                                                | Yes | 18288                | 155 (0.9%)                 | 0.005                         |
|                                                                                                          | No  | 23985                | 121 (0.5%)                 |                               |
| Cotton swabs                                                                                             | Yes | 25478                | 178 (0.7%)                 | 0.53                          |
|                                                                                                          | No  | 16795                | 98 (0.6%)                  |                               |
| Topical drops                                                                                            | Yes | 34265                | 220 (0.6%)                 | 0.88                          |
|                                                                                                          | No  | 8008                 | 56 (0.7%)                  |                               |
| Lidocaine gel                                                                                            | Yes | 9670                 | 41 (0.4%)                  | 0.24                          |
|                                                                                                          | No  | 32603                | 235 (0.7%)                 |                               |
| Retrolubar injection                                                                                     | Yes | 11                   | 0 (0%)                     | 0.34                          |
|                                                                                                          | No  | 42262                | 276 (0.7%)                 |                               |
| <b>Preparation</b>                                                                                       |     | <b>42027</b>         |                            |                               |
| 10% PVI                                                                                                  | Yes | 24639                | 159 (0.7%)                 | 0.61                          |
|                                                                                                          | No  | 17388                | 117 (0.7%)                 |                               |
| 5% betadine                                                                                              | Yes | 25597                | 153 (0.6%)                 | 0.25                          |
|                                                                                                          | No  | 16430                | 123 (0.8%)                 |                               |
| Gentamycin, ciprofloxacin or ciproxan                                                                    | Yes | 72                   | 0 (0%)                     | 0.50                          |
|                                                                                                          | No  | 41955                | 276 (0.7%)                 |                               |
| Baby shampoo and/or eyelid wipes                                                                         | Yes | 10                   | 1 (10%)                    | 0.34                          |
|                                                                                                          | No  | 42017                | 275 (0.7%)                 |                               |
| None/Refused                                                                                             | Yes | 51                   | 0 (0%)                     | 0.40                          |
|                                                                                                          | No  | 41976                | 276 (0.7%)                 |                               |
| <b>Post-injection medication</b>                                                                         |     | <b>42114</b>         |                            |                               |
| Antibiotic drops <sup>a</sup>                                                                            | Yes | 12831                | 98 (0.8%)                  | 0.21                          |
|                                                                                                          | No  | 29283                | 176 (0.6%)                 |                               |
| Diclofenac                                                                                               | Yes | 3882                 | 9 (0.2%)                   | 0.53                          |
|                                                                                                          | No  | 38232                | 265 (0.7%)                 |                               |
| 5% betadine                                                                                              | Yes | 9156                 | 53 (0.6%)                  | 0.96                          |
|                                                                                                          | No  | 32958                | 221 (0.7%)                 |                               |
| None/refused                                                                                             | Yes | 18334                | 128 (0.7%)                 | 0.24                          |
|                                                                                                          | No  | 23780                | 146 (0.6%)                 |                               |
| <b>Paracentesis</b>                                                                                      | Yes | 555                  | 2 (0.4%)                   | 0.13                          |
|                                                                                                          | No  | 40800                | 264 (0.7%)                 |                               |

Zero cells were replaced with a single complication to avoid division by zero.

<sup>a</sup>Gentamicin, ciprofloxacin, gatifloxacin, moxifloxacin, ciproxan, ofloxacin, polymixin, polymixin + trimethoprim, neomycin-polymyxin-dexamethasone, bacitracin-polymyxin, tobramycin

<sup>b</sup>Adjusted for patient sex, age, whether or not same-day bilateral injection, provider and number of visits in sample (frequency)
